# Supplementary material for: Apolipoprotein A1 deficiency in mice primes bone marrow stem cells for T cell lymphopoiesis
Source: Oxford University Press journal article supplement (doi:10.1242/jcs.258901), 2021-10-26
Supplement: jcs258901supp.pdf [file jcs258901supp.pdf]

**Table S1. Gating strategy for specific cell populations within the bone marrow**

| Name             | Marker combination                                                                                                                      |
|------------------|-----------------------------------------------------------------------------------------------------------------------------------------|
| Lin <sup>-</sup> | CD3e <sup>-</sup> ,Ly-6G <sup>-</sup> ,Ly-6C <sup>-</sup> ,CD11B <sup>-</sup> ,B220 <sup>-</sup> ,TER-119 <sup>-</sup>                  |
| LSK              | Lin <sup>-</sup> ,c-Kit <sup>+</sup> ,Sca-1 <sup>+</sup>                                                                                |
| LT-HSC           | Lin <sup>-</sup> ,c-Kit <sup>+</sup> ,Sca-1 <sup>+</sup> ,CD150 <sup>+</sup> ,CD48 <sup>-</sup>                                         |
| ST-HSC           | Lin <sup>-</sup> ,c-Kit <sup>+</sup> ,Sca-1 <sup>+</sup> ,CD150 <sup>-</sup> ,CD48 <sup>-</sup>                                         |
| MPP1a            | Lin <sup>-</sup> ,c-Kit <sup>+</sup> ,Sca-1 <sup>+</sup> ,CD150 <sup>-</sup> ,CD48 <sup>-</sup> ,CD135 <sup>-</sup>                     |
| MPP1a            | Lin <sup>-</sup> ,c-Kit <sup>+</sup> ,Sca-1 <sup>+</sup> ,CD150 <sup>-</sup> ,CD48 <sup>-</sup> ,CD135 <sup>+</sup>                     |
| MPP2             | Lin <sup>-</sup> ,c-Kit <sup>+</sup> ,Sca-1 <sup>+</sup> ,CD150 <sup>+</sup> ,CD48 <sup>+</sup>                                         |
| MPP3             | Lin <sup>-</sup> ,c-Kit <sup>+</sup> ,Sca-1 <sup>+</sup> ,CD150 <sup>-</sup> ,CD48 <sup>+</sup> ,CD135 <sup>-</sup>                     |
| MPP4             | Lin <sup>-</sup> ,c-Kit <sup>+</sup> ,Sca-1 <sup>+</sup> ,CD150 <sup>-</sup> ,CD48 <sup>+</sup> ,CD135 <sup>+</sup>                     |
| GMP              | Lin <sup>-</sup> ,c-Kit <sup>+</sup> ,Sca-1 <sup>-</sup> ,CD16/32 <sup>+</sup> ,CD34 <sup>+</sup>                                       |
| CMP              | Lin <sup>-</sup> ,c-Kit <sup>+</sup> ,Sca-1 <sup>-</sup> ,CD16/32 <sup>Med</sup> ,CD34 <sup>Med</sup>                                   |
| MEP              | Lin <sup>-</sup> ,c-Kit <sup>+</sup> ,Sca-1 <sup>-</sup> ,CD16/32 <sup>-</sup> ,CD34 <sup>-</sup>                                       |
| CLP              | Lin <sup>-</sup> ,c-Kit <sup>lo</sup> ,Sca-1 <sup>+</sup> ,CD48 <sup>+</sup> ,CD135 <sup>-</sup> ,CD127 <sup>+</sup>                    |
| Early CLP        | Lin <sup>-</sup> ,c-Kit <sup>lo</sup> ,Sca-1 <sup>+</sup> ,CD48 <sup>+</sup> ,CD135 <sup>+</sup> ,CD127 <sup>+</sup>                    |
| Late CLP         | Lin <sup>-</sup> ,c-Kit <sup>lo</sup> ,Sca-1 <sup>+</sup> ,CD48 <sup>+</sup> ,CD135 <sup>+</sup> ,CD127 <sup>+</sup> ,CD27 <sup>+</sup> |
| ETP              | c-Kit <sup>lo/med</sup> ,Sca-1 <sup>-/lo</sup> ,CD127 <sup>-</sup> ,CD27 <sup>+</sup> ,CD44 <sup>+</sup>                                |
